# Supplementary material
Source: Springer Nature journal article supplement (https://www.springermedizin.de/resource/supplementary/12950_2011_233_MOESM6_ESM.pdf/9558262)

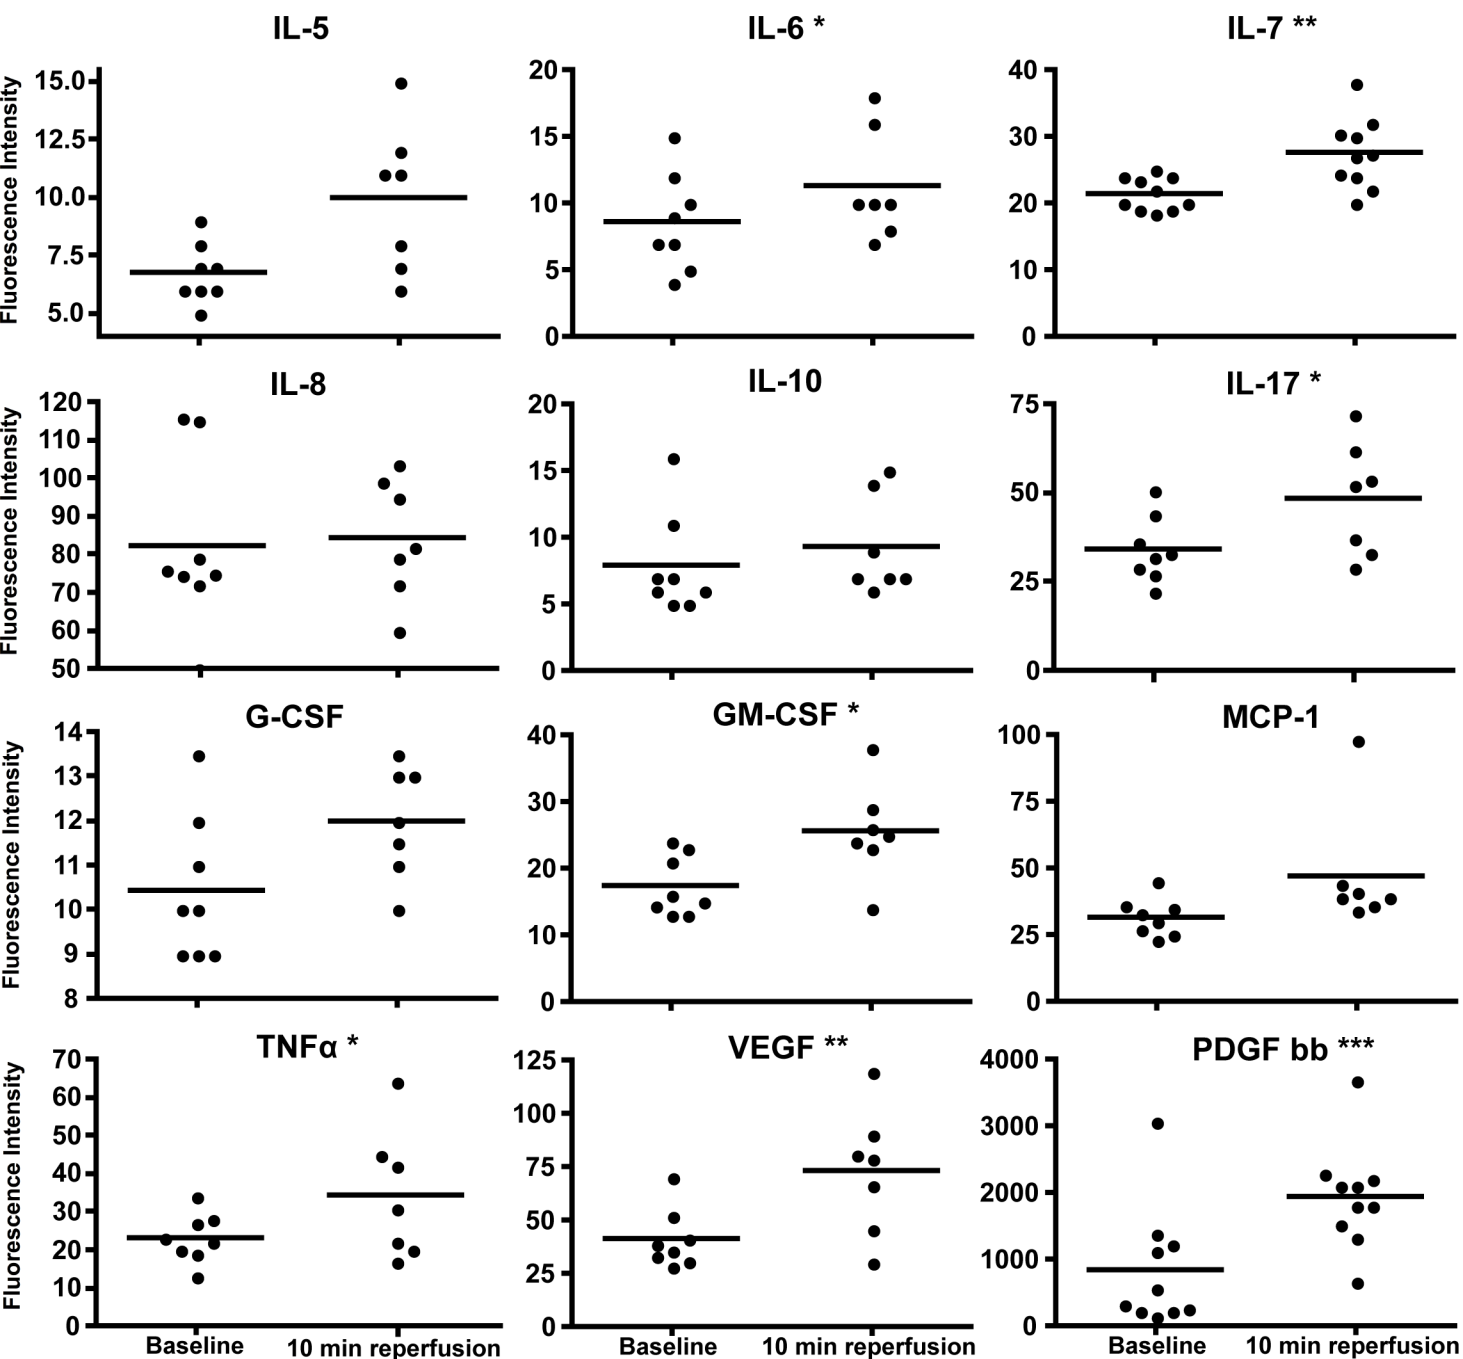

Supplement: MOESM6 [file 9558262]
